# Supplementary material for: AhNRAMP1 iron transporter is involved in iron acquisition in peanut
Source: PubMed Central journal article supplement — J Exp Bot. 2012 May 18;63(12):4437–46. doi: 10.1093/jxb/ers117 (PMC3421984; doi:10.1093/jxb/ers117), 2012-05-18
Supplement: supp_ers117_00077099-file001.pdf [file supp_ers117_00077099-file001.pdf]

# **AhNRAMP1 iron transporter is involved in iron acquisition in peanut**

*Hongchun Xiong, Takanori Kobayashi, Yusuke Kakei, Takeshi Senoura, Mikio Nakazono, Hirokazu Takahashi, Hiromi Nakanishi, Hongyun Shen, Penggen Duan, Xiaotong Guo, Naoko K Nishizawa, and Yuanmei Zuo*

## **Supplementary data**

Supplementary Fig. S1. Multiple alignments of the amino acid sequences of AhNRAMP1, LeNRAMP1, AtNRAMP1 and OsNRAMP1. Lines below the sequences indicate the position of the predicted transmembrane domains (TMs) in AhNRAMP1.

Supplementary Fig. S2. The expression level of *AhNRAMP1* in non-transformant (NT) and the *AhNRAMP1*-induced (IN) tobacco lines treated under Fe-deficient MS medium for 6 days. The vertical bars indicate the relative expression level of *AhNRAMP1* to the control tobacco *Actin* gene.

Supplementary Fig. S3. Zn concentration in new leaves of NT and *AhNRAMP1*-induced (IN) tobacco lines treated under Fe deficiency for 9 days in hydroponics.

Supplementary Fig. S4. Fe (A), Mn (B), Zn (C) and Cu (D) concentration in roots of NT and *AhNRAMP1*-induced (IN) tobacco lines treated under Fe deficiency for 9 days in hydroponics.



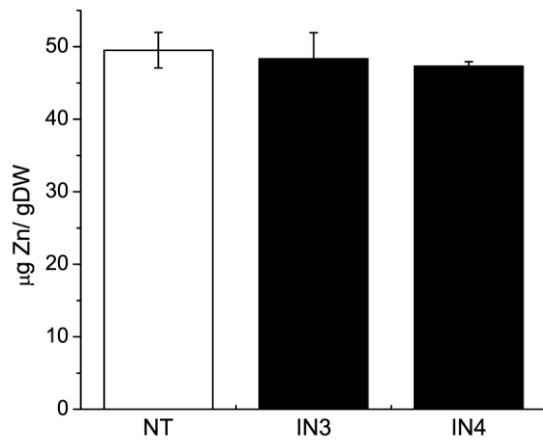

**Supplementary Fig. S3.**

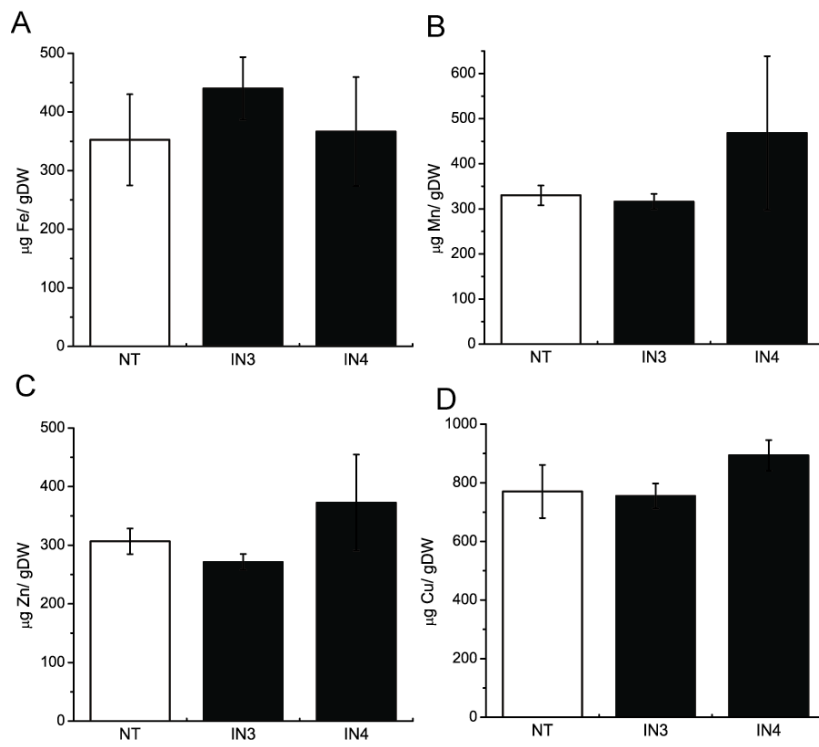

**Supplementary Fig. S4.**
